# Supplementary material for: Crystallization of ultrathin poly(3-hydroxybutyrate) films in blends with small amounts of poly(l-lactic acid): correlation between film thickness and molecular weight of poly(l-lactic acid)
Source: Royal Society of Chemistry journal article supplement (doi:10.1039/c7ra10996b), 2017-01-01
Supplement: c7ra10996b1.pdf [file c7ra10996b1.pdf]

## **Crystallization of Ultrathin Poly(3-hydroxybutyrate) Films in Blends with Small Amounts of Poly(L-lactic acid): Correlation between Film Thickness and Molecular Weight of Poly(L-lactic acid)**

Khasanah,<sup>a</sup> Isao Takahashi,<sup>\*b</sup> Kummetha Raghunatha Reddy,<sup>a,1</sup> and Yukihiro Ozaki<sup>\*a</sup>

<sup>a</sup>Department of Chemistry, School of Science and Technology, Kwansai Gakuin University, Gakuen 2-1, Sanda, Hyogo 669-1337, Japan.

<sup>b</sup>Department of Physics, School of Science and Technology, Kwansai Gakuin University, Gakuen 2-1, Sanda, Hyogo 669-1337, Japan.

<sup>1</sup>Present address: SABIC Research and Technology Pvt. Ltd, Chikkadunnasandra village Anekal Taluk, Off Sarjapur-attibele State Highway Bengaluru Area 562125, India.

\*Corresponding authors.

E-mail: suikyo@kwansai.ac.jp (I. Takahashi) and ozaki@kwansai.ac.jp (Y. Ozaki)

**Table 1.** Radius gyration ( $R_g$ ) of PHB and PLLA

| $M_w$ (g mol <sup>-1</sup> ) | $R_g$ (nm) | $2R_g$ (nm) |
|------------------------------|------------|-------------|
| <u>PHB</u>                   |            |             |
| 650,000                      | 39         | 78.1        |
| <u>PLLAs</u>                 |            |             |
| 300,000                      | 29.8       | 59.5        |
| 100,000                      | 15.9       | 31.7        |
| 50,000                       | 10.7       | 21.3        |
| 23,000                       | 6.8        | 13.6        |
| 13,100                       | 5.6        | 11.1        |
| 6,900                        | 4.9        | 9.9         |
| 3,600                        | 3.4        | 6.8         |
| 710                          | 2.6        | 5.2         |

Radius of gyration ( $R_g$ ) of PHB and PLLA was calculated using Mark-Howink and Flory-Fox

equations:

Mark-Howink Equation:  $[\eta] = K M^\alpha$  where,  $[\eta]$  = intrinsic viscosity

$K, \alpha$  = Mark-Howink parameters.

For PHB,  $K= 1.18 \times 10^{-4}$  and  $\alpha= 0.78^{(1)}$

For PLLA,  $K= 4.41 \times 10^{-4}$  and  $\alpha= 0.72^{(2,3)}$

Flory-Fox Equation:  $R_g = \frac{1}{\sqrt{6}} \left( \frac{[\eta] M}{\phi} \right)^{1/3}$  where,  $M$  = molecular weight (g mol<sup>-1</sup>)

$\phi$  = Flory viscosity constant ( $3 \times 10^{-24}$  /mol)

References:

(1) Deng, X.; Hao, J.; Yuan, M.; Xiong, C.; Zhao, S. *Polym. Int.* **2001**, *50*, 33-44.

- (2) Kim, S. H.; Kim, Y. H. *In* Biodegradable Plastics and Polymers; Doi, Y. and Fukuda, K. Eds.; Elsevier Science: New York, 1994; p 464-469.
- (3) Garlotta, D. A Literature Review of Poly(Lactic Acid). *J. Polym. Environ.* **2001**, *9*, 63-84.
